# Supplementary material for: Indium-mediated reductive dehalogenation of α-halocarbonyl compounds in water†
Source: Royal Society of Chemistry journal article supplement (doi:10.1039/b005278g), 2000-01-01
Supplement: b005278g.doc [file b005278g.doc]

**Supplementary data**

**Indium-mediated reductive dehalogenation of -halocarbonyl compounds in water**

**Leeyoung Park,*a* Gyochang Keum,*a* Soon Bang Kang,*a* Kwan Soo Kim*b* and Youseung Kim**a***

*a Biochemicals Research Center, Korea Institute of Science and Technology, Cheongryang P.O. Box 131, Seoul 130-650, Korea.* E-mail: yosekim@kistmail.kist.re.kr; Fax: +82-2-958-5189

*b Department of Chemistry, Yonsei University, Seoul 120-749, Korea*

**Details of the synthesis and analytical data for -halocarbonyl compounds 1a, 1i, 1j and 1l–1o**

**Preparation of -halocarbonyl compounds**

**Benzyl 2-chloropropionate (1a)**

A solution of 2-chloropropionyl chloride (1.27 g, 10 mmol) in benzene (1 cm3) was added dropwise over 5 min to a stirred solution of benzyl alcohol (1.08 g, 10 mmol) and triethylamine (1.01 g, 10 mmol) in benzene (5 cm3) at room temperature. After 30 min, the resulting precipitate was filtered off and the filtrate was washed with sodium carbonate and brine. The solvent was dried (MgSO4) and evaporated under reduced pressure to leave a yellow oil, benzyl 2-chloropropanate (1.87 g, 94%); **max(film)/cm-1 3066, 3034, 2988, 1764, 1726, 1450, 1380, 1336, 1252, 1182, 1074, 750 and 700; **H(300 MHz; CDCl3) 1.71 (3 H, d, *J* 6.87, *CH3*CHClCO), 4.45 (1 H, q, *J* 6.94, CH3*CH*ClCO), 5.22 (2 H, s, O*CH2*Ph) and 7.40-7.34 (5 H, m, aromatic); **C (75 MHz, CDCl3) 21.9, 52.9, 68.0, 128.6, 128.9, 129.0, 135.5 and170.4; *m/z* (EI) 198(M+, 12%), 108 (11), 91 (100), 77 (11), 65 (19), 63 (14) and 51(7).

***N*-Benzyl 2-bromoacetamide (1j)**1

A solution of sodium hydroxide (1.38 g, 34.4 mmol) in water (1.7 cm3) was added to a stirred solution of benzyl amine (3.69 g, 34.4 mmol) and benzyltriethylammonium chloride (0.08 g, 0.35 mmol) in dichloroehtane (26 cm3). After bromoacetyl bromide (6.94 g, 34.4 mmol) was added slowly dropwise to the stirred solution at -10 ℃, the reaction mixture was further stirred at room temperature for overnight. The organic layer was successively washed with 1 N NaOH (2  5 cm3), 1 N HCl (2  5 cm3), and brine. The solvent was dried (MgSO4) and concentrated under reduced pressure to leave a solid, which was recrystallized from ethyl acetate - *n*-hexane to give the product of mp 110-111.6 C (3.06 g, 39 %) as a white solid; **max(film)/cm-1 3278, 3072, 3014, 2954, 1646, 1554, 1454, 1422, 1212, 746, 698 and 496; **H(300 MHz; CDCl3) 3.93(2 H, s, CO*CH2*Br), 4.48(2 H, d, *J* 5.8, NH*CH2*Ph) and 7.28-7.37(5 H, m, aromatic); **C(75 MHz, CDCl3) 29.5, 44.6, 128.1, 128.2, 129.2, 137.7 and 165.8; *m/z* (EI) 148 (100), 107 (52), 91 (55), 79 (23), 65 (18) and 51 (19).

***N, N*-Diisobutyl 2-bromoacetamide (1i)** 1

A solution of sodium hydroxide (1.38 g, 34.4 mmol) in water (1.7 cm3) was added to a stirred solution of diisopropylamine (6.01 cm3, 34.4 mmol) and benzyltriethylammonium chloride (0.08 g, 0.35 mmol) in dichloroehtane (26 cm3). After bromoacetyl bromide (6.94 g, 34.4 mmol) was added slowly dropwise to the stirred solution at -10 ℃, the reaction mixture was further stirred at room temperature for overnight. The organic layer was successively washed with 1 N NaOH (2  5 cm3), 1 N HCl (2  5 cm3), and brine. The solvent was dried (MgSO4) and concentrated under reduced pressure to leave a solid, which was purified by short column chromatography to give the product (5.38 g, 62.5 %) as a colourless oil; **max(film)/cm-1 2926, 2872, 1660, 1630, 1442, 1388, 1368, 1264, 1210, 1100, 642 and 578; **H(300 MHz; CDCl3) 0.87 (6 H, d, *J* 6.8 , CH*(CH3)2*), 0.91 (6 H, d, *J* 6.6, CH*(CH3)2*), 1.94 (1 H, m, *CH*(CH3)2), 2.03 (1 H, m, *CH*(CH3)2), 2.18 (3 H, s, *CH3*CO), 3.09 (2 H, d, *J* 7.5, N*CH2*CH) and 3.20 (2 H, d, *J* 7.5, N *CH2*CH); **C(75 MHz, CDCl3) 20.4, 26.6, 27.1, 28.2, 53.3, 56.5 and 167.5; *m/z* (EI) 251/249 (M+, 2/2), 206/208(22/22), 170 (18), 86 (100) and 57(19).

**3-Bromo-1-Methyl-2-pyrrolidinone (1l)**2

After a solution of 2,4-dibromobutanoyl chloride (32 g, 0.12 mol) in chloroform (30 cm3) was added to a stirred solution of 40 % aqueous methyl amine (23 cm3, 0.27 mol) in chloroform (100 cm3) containing water (20 cm3) at 0 C, the resulting solution was kept at room temperature for 1 h. The reaction mixture was successively washed with 0.5 N HCl, saturated NaHCO3 and brine. The solvent was dried (MgSO4) and concentrated under reduced pressure to leave a yellow oil, *N*-methyl-2,4-dibromobutanamide (29.6 g, 95,4 %) suitable for use of next step without further purification. To this solution of *N*-methyl-2,4-dibromobutanamide (27.8 g,0.11 mol) in ethanol (65 cm3) was added cautiously dropwise a solution of sodium (2.47 g, 0.11 mol) in ethanol (50 cm3) at room temperature. After the reaction was complete, the solvent was concentrated under reduced pressure to leave a residue, which was diluted with chloroform and then washed with H2O and brine. The organic layer was dried (MgSO4) and concentrated to a yellow oil, which was purified by distillation under reduced pressure (89-94 C/1 mmHg) to afford the product (11.87 g, 60.6 %) as a colorless oil; **max(film)/cm-1 2932, 2878, 1710, 1690, 1664, 1502, 1452, 1402, 1300, 1264, 1168, 1112, 1048, 980, 880, 686, 666 and 526; **H(300 MHz; CDCl3) 2.32(1 H, ddt, *J* 14.6, 6.9 and 2.7, CHBr*CH*), 2.63(1 H, ddt, *J* 14.7, 7.5 and 7.4, CHBr*CH*), 2.91(3 H, s, N*CH3*), 3.34(1 H, ddd, *J* 9.0, 7.9 and 2.6, CH3N*CH*), 3.58(1 H, dt, *J* 9.9 and 7.2, CH3N*CH*), 4.46(1 H, dd, *J* 7.3 and 2.6, Br*CH*CH2); **C(75 MHz, CDCl3) 30.4, 30.9, 44.5, 47.9, 171.2; *m/z* (EI) 179/177(M+, 27/27), 98 (100), 97 (25), 69 (13), 55 (28).

**2,4-Dibromobutanoyl chloride**2

Bromine was added cautiously dropwise to a stirred mixture of -butyrolactone (5.3 g, 61.3 mmol) and phosphorous tribromide (0.3 g, 1.1 mmol) at 110 to115 C. After the reaction mixture was cooled to 50 C, one drop of DMF was added to the resulting reaction mixture. To this was added slowly dropwise thionyl chloride (8.61 g, 72.4 mmol) and the resulting reaction mixture was stirred at 90 C for 3h. Distillation of the reaction mixture under reduced pressure (60 C/1 mmHg) to afford the product (14.3 g, 88 %) as a colorless oil; **H(300 MHz; CDCl3) 2.47-2.71 (2 H, m, BrCH2*CH2*CHBr), 3.54-3.59(2 H, m, Br*CH2*CH2), 4.86 (1 H, dd, *J* 9.1 and 4.9, CH2*CH*Br)

**2-Chloro-2-phenylacetonitrile (1m)**3

A solution of sodium bisulfite (10.2 g, 98.4 mmol) in water (28.3 cm3) was added to a stirred solution of benzaldehyde (10.4 g, 98.4 mmol) and sodium cyanide (4.82 g, 98.4 mmol) in water (17 cm3) at 0℃ and the reaction mixture was stirred at room temperature for 6 h. The intermediate was extracted with benzene (2  cm3). The combined extracts were washed successively with H2O and brine, dried over magnesium sulfate, filtered and concentrated *in vacuo* to afford 2-hydroxy-2-phenylacetonitrile (9.17 g, 70 %) as a colorless oil. A solution of this intermediate (13.3 g, 0.1 mol) was added to a stirred solution of pyridine (16.8 g, 0.2 mol) and phosphorus oxychloride (18.4 g, 0.12 mol) in anhydrous benzene (30 cm3) at room temperature. The reaction mixture was stirred at the same temperature for overnight and the solvent was evaporated *in vacuo* to give a residue. The residue was diluted with cold H2O (20 cm3) and Et2O (60 cm3). The organic layer was dried (CaCl2) and removed under reduced pressure to leave a colorless oil (15.2 g, 63%); **max(film)/cm-1 3036, 3066, 2964, 1494, 1456, 1272, 1196, 958, 824, 774, 704 and 626; **H(300 MHz; CDCl3) 5.57 (1 H, s, Ph*CH*), 7.47-7.48 (3 H, m, aromatic) and 7.55-7.59(2 H, m, aromatic); **C(75 MHz, CDCl3) 44.6, 116.5, 128.0, 129.9, 130.9 and 133.5; *m/z* (EI) 153/151 (M+, 5/15), 116 (100), 89 (22), 63 (13), 51 (7).

**2-Bromo-2-phenylacetonitrile (1n)**4

A solution of 2-phenylacetonitrile (4.69 g, 40 mmol) in carbontetrachloride (24 cm3) was added cautiously dropwise to a stirred solution of *N*-bromosuccinimide (7.12 g, 40 mmol) and dibenzoylperoxide (0.38 g, 1.6 mmol) in carbontetrachloride (40 cm3) at reflux for 6 h, and then the reaction mixture was cooled to room temperature. The resulting white precipitate was filtered off and the filtrate was washed with saturated NaHCO3,. The organic solvent was dried and evaporated and the product was purified by column chromatography on silica with *n*-hexane-ethyl acetate (4:1) as eluant to give the product (4.23 g, 54 %) as a yellow oil; **max(film)/cm-1 4052, 3652, 3066, 3034, 2972, 2246, 1760, 1496, 1454, 1188, 1138, 1002, 972, 818, 692, 654, 622 and 498; **H(300 MHz; CDCl3) 5.50 (1 H, s, Ph*CH*Br), 7.42-7.48 (3 H m, aromatic) and 7.56-7.59 (2 H, m, aromatic); **C(75 MHz, CDCl3) 27. 9, 116.7, 128.2, 129.9, 130.8 and 133.9.

**1-Bromooctyl cyanide (1o)**5

Bromine (32.8 g, 205 mmol) was added slowly dropwise to a stirred mixture containing nonanoic acid (15.8 g, 100 mmol) and phosphorous tribromide (28.4 g, 105 mmol) until the reaction mixture retains a deep bromine coloration. The reminder of the bromine is then added all at once, and the reaction mixture was heated at 85-90℃ for 1 h. After the reaction mixture was cooled to 0 C, 30 % aqueous ammonia was added. The precipitated residue was collected by filtration, dissolved in methylene chloride (300 cm3) and the organic phase was successively washed with 1N HCl, saturated Na2SO4 and brine. The organic solvent was dried (MgSO4) and concenrated under reduced pressure to leave a residue. To this was added thionyl chloride (23.8 g, 200 mmol) and the reaction mixture was heated at reflux for 1.5 h. Fractional distillation of the resultant reaction mixture under reduced pressure (69-70 C/1 mmHg) yielded the product (13.1 g, 60%); **max(film)/cm-1 2950, 2858, 2244, 1464, 1378, 724, 696, 616 and 448; **H(300 MHz; CDCl3) 0.87-0.90 (3 H, m, CH2*CH3*), 1.30-1.34(8 H, m, CH2(*CH2)4*CH3), 1.53-1.60 (2 H, m, *CH2*(CH2)4CH3), 2.06-2.13 (2 H, m, *CH2*CHBr) and 4.29 (1 H, t, *J* 7.0, *CH*); **C(75 MHz, CDCl3) 14.4, 22.9, 27.3, 27.7, 28.8, 29.3, 31.98, 36.9 and 117.8; *m/z* (EI) 218 (M+, 1), 202/204 (2/2), 138 (28), 110 (45), 96 (100), 82 (77), 69 (29) and 54 (53).

# References

1 Pulukkody, K. P.; Norman, T. J.; Parker, D.; Royle, L.; Broan, C. *J. Chem. Soc. Perkin Trans. 2*, **1993**, 605.

2 Ikuta, H.; Shirota, H.; Kobayashi, S.; Yamagishi, Y. Yamada, K.; Yamatsu, I.; Katayama, K. *J. Med. Chem.*, **1987**, *30*, 1995.

3 Baumgarten, H. E. In *Organic Synthesis collective vol.Ⅴ*, John Willey and Sons, New York, **1973**, pp 437,Yoshihara, M.; Eda, T.; Sakaki, K.; Maeshima, T., *Synthesis*, **1980**, 746.

4 Molina, P.; Lopez-Leonardo, C.; Llamas-Botia, J.; Foces-Foces, C.; Fernandez-Castano, C., *Tetrahedron*, **1996**, *52*, 9629.

5 Adams, R. *Organic Synthesis collective vol. Ⅳ*, John Willey and Sons, New York, **1963**, pp 616, Gradley, M. L.; Knowles, C. J. *Biotechnology Letters*, **1994**, *16*, 41-46.
